# Supplementary material
Source: PubMed Central journal article supplement (PMC2701030)
Supplement: 0901840106_0901840106SI.pdf [file 0901840106_0901840106SI.pdf]

# Supporting Information

Sanchez et al. 10.1073/pnas.0901840106

## SI Materials and Methods

**In Vivo Experimental Design. Animals.** Male Sprague–Dawley rats (Harlan) were used throughout the experiments. They arrived at 5 weeks old (experiments 1, 3, and 4) or at 2 weeks old with a dam (experiment 2) in approved facilities, and were housed at 21 °C under diurnal lighting conditions (lights on from 06:00 AM to 06:00 PM). They were maintained in groups of 6 in plastic cages (type E cages; Charles River) with free access to food and water. After 2 weeks of acclimatization, rats underwent 3 weeks of experimental procedure. After pilocarpine-induced status epilepticus (Pilo-SE), rats were housed individually to support recovery until being killed. Control rats were housed in groups of 6 throughout all of the experiment to avoid deleterious effects related to stress isolation. Control rats received systematically corresponding injections of saline solution.

**Experiment 1.** Brain expression of *Epo* and *EpoR* genes was determined in the hippocampus (Hi) and the ventral limbic region (VLR) of control rats ( $n = 10$ ) and rats subjected to either 1 ( $n = 13$ ) or 3 ( $n = 22$ ) hypoxic (H) exposure(s). Expression profiles of erythropoietin (Epo) and Epo receptor (EpoR) mRNAs were measured by RT-qPCR in control rats ( $n = 6$ ), and at various reoxygenation times after either 1H (0 h,  $n = 4$ ; 1 day,  $n = 3$ ; 2 days,  $n = 3$ ; 8 days,  $n = 3$ ) or 3H (0 h,  $n = 4$ ; 1 day,  $n = 4$ ; 2 days,  $n = 4$ ; 8 days,  $n = 4$ ). Also, immunostaining on brain sections of Epo and EpoR was realized in combination or not with neuronal (NeuN) and astrocytic (GFAP) markers at 1 ( $n = 3$ ) and 3 ( $n = 3$ ) days after 3H ( $n = 6$ ). Degenerative processes were also assessed after reoxygenation in all groups. Control rats ( $n = 4$ ) were included in this analysis.

**Experiment 2.** Rats were housed in MARLAU enriched cages (EC), developed in our group to standardize environmental enrichment, or 2 standard cages (SC, type E, Charles River). Six and 12 rats were grouped together in SC and EC, respectively, from weaning until completion of the experiment. Six weeks after weaning, half of the rats of each SC and EC conditions (6/12 rats in each condition) were subjected to 3H. Levels of *EpoR* and *Epo* transcripts were measured by RT-qPCR in the dorsal Hi (HiD), the ventral Hi (HiV), the neocortex (NC), and the VLR of 4 rats in each group. The remaining rats ( $n = 2$  per group) were used for EpoR immunostaining.

**Experiment 3.** To determine whether 3 hypoxic exposures could enhance recombinant human (rh)Epo neuroprotective effects after Pilo-SE, rats were subjected to 3H ( $n = 12$ ) or not ( $n = 12$ ) before Pilo-SE. In each group, half of the rats that underwent Pilo-SE were treated or not with rhEpo at 5,000 international units/kg i.p. immediately after cessation of SE, and then 1 and 3 days later. This dose of rhEpo corresponds to the optimal neuroprotective dose with this route of administration (1). Neuronal protection was evaluated 6 days after Pilo-SE by measuring the density of NeuN+ cells in the VLR. Control rats ( $n = 6$ ) received the same injections as rats subjected to SE, except that saline was substituted for pilocarpine.

**Experiment 4.** Tissue concentration of rhEpo in the VLR and the HiD was determined at different times (1 and 4 h) after its peripheral administration in control rats ( $n = 6$ ) and in rats subjected to Pilo-SE ( $n = 6$ ). In these latter, rhEpo was administered just after cessation of SE.

**RT-qPCR.** Sequences of the different primer pairs used are as follows: *Epo* (GenBank NM\_017001) forward 5'-GCT CCA ATC TTT GTG GCA TC-3', reverse 5'-ATC CAT GTC TTG CCC CCT A 3'(66 bp); *EpoR* (GenBank D13566) forward 5'-CCA

GCT CTA AGC TCC TGT GC-3', reverse 5'-CTT CAG GTG AGG TGG AGT GG-3' (68 bp), *IGF-1* (GenBank NM\_178866.2) forward 5'-ATG CCC AAG ACT CAG AAG GA-3', reverse 5'-CGT GGC ATT TTC TGT TTC TC-3' (110 bp), *Tpo* (GenBank D32207) forward 5'-CCC AAG CAG AAC CTC TCA AC-3', reverse 5'-TCA GGT ATC CAG GGA TTT GG-3' (200 bp), *TpoR* (2) forward 5'-AGA ACC CAC AGA GTG GTG TG-3', reverse 5'-TCA CAC CAT CCA GGA GCA AGA AT-3' (220 bp). All primer pairs were designed by using Primer 3 software (National Institutes of Health; www.basic.nwu.edu).

**Immunohistochemistry.** Free-floating sections (40  $\mu$ m thick) from paraformaldehyde-fixed tissue were incubated either with a rabbit polyclonal anti-Epo antibody (sc-7956; Santa Cruz), or with a rabbit polyclonal anti-EpoR antibody (sc-697; Santa Cruz), or with a mouse monoclonal anti-NeuN antibody (MAB-377; Chemicon) or a GFAP antibody (G3893; Sigma). For colorimetric immunolabeling, sections were then incubated with a biotinylated donkey antibody raised against mouse IgG (715-065-151; Jackson ImmunoResearch). Sections were incubated with avidin-biotin-peroxidase (1:500; Vectastain Elite ABC kit, Vector) and reacted with 0.4 mM 3',3'-diaminobenzidine (DAB, Vector). For fluorescent dual immunolabeling, sections were exposed to an Alexa Fluor-488-conjugated donkey anti-rabbit IgG antibody (A-21206; Molecular Probes) and to an Alexa Fluor-633-conjugated goat anti-mouse IgG antibody (A21052; Molecular Probes). Sections were then mounted on Superfrost-Plus slides and coverglassed with Prolong Gold Antifade reagent (Molecular Probes). Images were captured by a TCS SP2 confocal microscopy system (Leica). Images were then imported into Adobe Photoshop 8.0.1 (Adobe Systems) for further editing.

**Antibody Characterization.** For Epo-R, a polyclonal rabbit antibody [Santa Cruz no. sc-697 (M-20)] raised against the C-terminal cytoplasmic domain of the precursor form of mouse EpoR was used. This antibody reveals in rat brain homogenates a single band slightly above the expected 66-kDa size (3, 4). Brain mapping of EpoR protein using this antibody has been a matter of intensive debate due to the production of diverging results (4). Its specificity has then been questioned in a report showing immunolabeling in *EpoR*-knockout mice (*EpoR*<sup>-/-</sup>) (5). However, conclusions raised from these *EpoR*<sup>-/-</sup> mice must be taken with caution, because the *EpoR* gene, which is composed of 8 exons, has been silenced by deletion of exons 1–6 only (3, 6). In the eventuality of a chimeric protein, partly encoded by the remaining exons 7–8, a signal may be obtained with the M-20 antibody, which is directed against an epitope encoded by exons 7–8 of the *EpoR* gene. A complete abolition of Epo-R immunohistofluorescent labeling in rat brain tissue sections has been reported, when this antibody was preincubated with a 5-fold excess of the M-20-immunizing peptide (sc-697P) (7, 8).

For Epo, a polyclonal rabbit antibody [Santa Cruz no. sc-7956 (H-162)] raised against amino acids 28–189 from mature human Epo was used. This antibody stains a single 33-kDa band in Western blot analysis of Epo expression in normal rat kidney cell line transformed by the Kirsten murine sarcoma virus (KRNC cells) (manufacturer's technical information).

For the detection of neuronal cell type in brain slices, we used the monoclonal mouse antibody (Chemicon no. MAB-377) raised against undetermined nuclear proteins of neurons (NeuN). This antibody recognizes 2 or 3 bands in the 46-

48-kDa range, and possibly another band at  $\approx 66$  kDa (manufacturer's technical information). Even if the sequence of the immunizing antigen(s) has not been established yet, this antibody has been shown to stain neurons exclusively, both in vivo and in vitro, recognizing most of neuronal cell types throughout the central nervous system of numerous vertebrates (9).

Mouse anti-GFAP (Sigma no. G3893, monoclonal, immunogen: whole GFAP protein from pig spinal cord) reacts specifically with GFAP in immunoblotting assays and labels astrocytes in brain tissue sections (manufacturer's technical information).

**Neuronal Density Measurement.** Sections immunostained for NeuN were observed under a light microscope (Diaplan; Leitz) by 2 independent investigators who were blind to the groups from which the sections were taken. Images were captured with a video camera 3CCD (DXC-930P; Sony) coupled to an image analysis system (Visilog 6.3; Noesis). The system allows one to

scan at magnification  $10\times$  adjacent fields throughout the whole ventral region, and to reconstruct a single image composed of a mosaic of the digitized adjacent fields. Mosaics of the ventral region, composed of the amygdala, the piriform cortex, and the insular agranular cortex, were captured at both interaural (IA) +6.44 and +5.40 mm. To obtain an index of the neuronal density, the surface area occupied by NeuN+ cells within the VLR or within areas CA1 and CA3 of the HiD was divided by the total surface area.

**Measurement of the Intensity of Epo- or EpoR-Immunofluorescent Labeling in Neurons.** Sections used were all processed together for the dual immunofluorescent labeling of Epo or EpoR with NeuN. They were then analyzed at the same conditions of photomultiplier gain, offset, and pinhole aperture by using a TCS SP2 confocal microscopy system (Leica), allowing the comparison of fluorescence intensity in all neurons contained in the image by using an image analysis system (Visilog 6.3; Noesis).

1. Calapai G, et al. (2000) Erythropoietin protects against brain ischemic injury by inhibition of nitric oxide formation. *Eur J Pharmacol* 401:349–356.
2. Ehrenreich H, et al. (2005) A hematopoietic growth factor, thrombopoietin, has a proapoptotic role in the brain. *Proc Natl Acad Sci USA* 102:862–867.
3. Fu QL, et al. (2008) Up-regulated endogenous erythropoietin/erythropoietin receptor system and exogenous erythropoietin rescue retinal ganglion cells after chronic ocular hypertension. *Cell Mol Neurobiol* 28:317–329.
4. Kirkeby A, van Beek J, Nielsen J, Leist M, Helboe L (2007) Functional and immunochemical characterisation of different antibodies against the erythropoietin receptor. *J Neurosci Methods* 164:50–58.
5. Elliott S, et al. (2006) Anti-Epo receptor antibodies do not predict Epo receptor expression. *Blood* 107:1892–1895.
6. Wu H, Liu X, Jaenisch R, Lodish HF (1995) Generation of committed erythroid BFU-E and CFU-E progenitors does not require erythropoietin or the erythropoietin receptor. *Cell* 83:59–67.
7. Grimm C, et al. (2002) HIF-1-induced erythropoietin in the hypoxic retina protects against light-induced retinal degeneration. *Nat Med* 8:718–724.
8. Sanchez PE, et al. (2009) Erythropoietin receptor expression is concordant with erythropoietin but not with common beta chain expression in the rat brain throughout the life span. *J Comp Neurol* 514:403–414.
9. Mullen RJ, Buck CR, Smith AM (1992) NeuN, a neuronal specific nuclear protein in vertebrates. *Development* 116:201–211.
10. Paxinos G, Watson C (1998) *The Rat Brain in Stereotaxic Coordinates* (Academic, New York), 4th Ed, p 256.









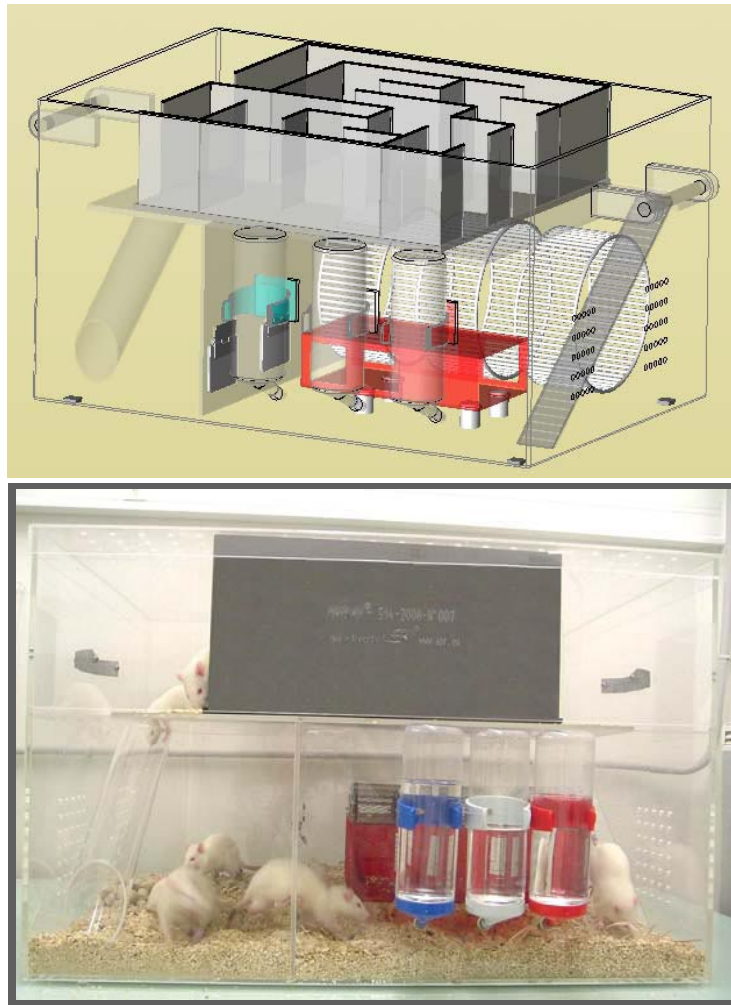

**Fig. S5.** MARLAU cage (patent no. FR09/00544), a cage to calibrate environmental enrichment in rodents. This cage allows increased social interactions (12 rats per cage), increased voluntary exercise (large surface area and presence of 3 running wheels), “diverting” activities (red tunnel, ladder, and toboggan slide), and cognitive stimulations using labyrinths, the configuration of which is changed 3 times a week.
